# Supplementary material for: The Risk Factors of Polymicrobial Periprosthetic Joint Infection: A Single-Center Retrospective Cohort Study.
Source: Research Square preprint supplement (doi:10.21203/rs.3.rs-412043/v1), 2021-04-16
Supplement: Supplementary file 1 [file 3efc5ffbe4213a0560478c06.pdf]

Table 3: The risk factors associated with polymicrobial periprosthetic joint infection

| factors             | Polymicrobial cohort | Monomicrobial cohort | OR               | Adjusted OR      | P Value           |
|---------------------|----------------------|----------------------|------------------|------------------|-------------------|
| <i>Host factors</i> |                      |                      |                  |                  |                   |
| BMI**               |                      |                      | <b>1.021</b>     | <b>1.047</b>     | <b>0.254</b>      |
| Sinus               |                      |                      | <b>3.405</b>     | <b>2.565</b>     | <b>&lt;0.001*</b> |
| Age**               |                      |                      | <b>0.978</b>     | <b>0.984</b>     | <b>0.171</b>      |
| Previous revisions  |                      |                      | <b>2.512</b>     | <b>1.954</b>     | <b>0.039*</b>     |
| knee                |                      |                      | <b>0.402</b>     | <b>0.479</b>     | <b>0.023*</b>     |
| <i>Pathogens</i>    |                      |                      |                  |                  |                   |
| S. aureus           | <b>13</b>            |                      | <b>1.134</b>     | <b>0.624</b>     | <b>0.273</b>      |
| CNS                 |                      |                      | <b>1.773</b>     | <b>2.183</b>     | <b>0.017*</b>     |
| Streptococcus       |                      |                      | <b>5.499</b>     | <b>6</b>         | <b>0.001*</b>     |
| enterococcus        |                      |                      | <b>2.669</b>     | <b>3.025</b>     | <b>0.012*</b>     |
| Gram negative       |                      |                      | <b>2.593</b>     | <b>2.255</b>     | <b>0.047*</b>     |
| fungus              |                      |                      | <b>0.922</b>     | <b>0.840</b>     | <b>0.814</b>      |
| E. coli             |                      |                      | <b>&lt;0.001</b> | <b>&lt;0.001</b> | <b>0.999</b>      |
| Atypical pathogens  |                      |                      | <b>4.371</b>     | <b>5.032</b>     | <b>0.01*</b>      |

CNS: coagulation negative staphylococcus

\*P<0.05

\*\*the values were given as means with the 95%CI in the parentheses.

\* the values were given as the number of pathogens with the percentage in the parentheses.
