# Supplementary material for: The Risk Factors of Polymicrobial Periprosthetic Joint Infection: A Single-Center Retrospective Cohort Study.
Source: Research Square preprint supplement (doi:10.21203/rs.3.rs-412043/v1), 2021-04-16
Supplement: Supplementary file 2 [file f9234c6b3d59969ce47e16f8.pdf]

| characteristic                                   | Polymicrobial<br>PJI n=64 | Monomicrobial<br>PJI n=158 | P value |
|--------------------------------------------------|---------------------------|----------------------------|---------|
| Age(years)*                                      | 59(55.8,62.9)             | 64.2(62.1,66.2)            | 0.012   |
| Knees, n (%)                                     | 24, (37.5%)               | 94, (59.5%)                | 0.003   |
| Male, n (%)                                      | 27, (42.2%)               | 70, (44.9%)                | 0.773   |
| Body Mass Index* (Kg/m2)                         | 25.8(24.9,26.7)           | 25.5(24.8,26.2)            | 0.637   |
| Sinus tract, n (%)                               | 31, (48.4%)               | 17, (10.8%)                | <0.001  |
| CRP * (mg/L)                                     | 1.79 (0.54, 3.03)         | 6.03 (4.0,8.1)             | 0.385   |
| ESR * (mm/h)                                     | 50.6(25.6,75.6)           | 54.1(43.8,64.2)            | 0.489   |
| Previous revisions, n (%)                        | 30, (46.9%)               | 43, (27.2%)                | 0.005   |
| PJI                                              | 25, 83.33                 | 31, 72.09                  |         |
| Aseptic loosening                                | 4,13.33                   | 2, 4.6                     |         |
| dislocation                                      | 0                         | 1, 2.32                    |         |
| Periprosthetic fracture                          | 0                         | 2, 4.6                     |         |
| Other reasons                                    | 1,3.33                    | 7, 16.28                   |         |
| Synovial fluid polymorphonuclear neutrophils (%) | 49.04(17.93,80.15)        | 48.67(34.9,62.3)           | 0.923   |
| Synovial fluid white blood-cell count (cells/mL) | 18886 (2377, 35394)       | 1819 (12423, 23972)        | 0.907   |

**Table 1:** The demographic characteristics of PJI patients included in this study.

\*values were given as means with 95%CI in the parentheses.
